# Supplementary material for: Genetic Variation versus Morphological Variability in European Peatland Violets (Viola epipsila—V. palustris Group)
Source: MDPI journal article supplement (doi:10.3390/biology12030362), 2023-02-24
Supplement: s1 [file s1]

Table S2.

Comparison of genome size of selected specimens of *V. pubifolia*, *V. palustris*, hybrids *V. epipsila* × *V. palustris*, and *V. epipsila*.

| Taxon                                                         | Mean                       |            |
|---------------------------------------------------------------|----------------------------|------------|
|                                                               | 2C DNA (pg)<br>(±SD)       | 1C/Cx (pg) |
| <i>V. pubifolia</i> (N=39)                                    | 4.14 (±0.14) <sup>a</sup>  | 2.07/0.52  |
| <i>V. epipsila</i> (N= 3)                                     | 2.52* (±0.03) <sup>b</sup> | 1.26/0.63  |
| <i>V. palustris</i> (N= 4)                                    | 4.26* (±0.02) <sup>a</sup> | 2.13/0.53  |
| Hybrid (N=15)<br>( <i>V. epipsila</i> × <i>V. palustris</i> ) | 3.42* (±0.06) <sup>c</sup> | 1.71/0.57  |

Average values followed by the same letter do not differ significantly at  $P \leq 0.05$  in Kruskal-Wallis test

\*Data taken from Žabicka et al. 2020 [30].
