# Supplementary material for: Genetic Variation versus Morphological Variability in European Peatland Violets (Viola epipsila—V. palustris Group)
Source: MDPI journal article supplement (doi:10.3390/biology12030362), 2023-02-24
Supplement: s1 [file s1]

Table S3. Comparison of features of *V. pubifolia*, *V. epipsila*, *V. palustris*, interspecific hybrid (*V. epipsila* × *V. palustris*) based on selected European floras and publications.

| Feature                                                                                |                                                                                                | <i>V. epipsila</i>   | <i>V. palustris</i>      | Hybrid F <sub>1</sub><br>( <i>V. epipsila</i> × <i>V. palustris</i> ) | <i>V. pubifolia</i>  |
|----------------------------------------------------------------------------------------|------------------------------------------------------------------------------------------------|----------------------|--------------------------|-----------------------------------------------------------------------|----------------------|
| <b>leaf</b>                                                                            |                                                                                                |                      |                          |                                                                       |                      |
| - length/width ratio                                                                   |                                                                                                | 0.51–1.50 (f, h)     | <b>0.54–1.17</b> (f, h)  | 0.62–1.36 (f, h)                                                      | <b>0.58–0.87</b> (f) |
| - pubescence of the lower surface                                                      | hairy                                                                                          | + (a, b, c, f, g, h) | + (b, g)                 | + (f, h)                                                              | + (f, i)             |
|                                                                                        | glabrous                                                                                       |                      | + (a, b, f, g, h, c)     | + (f, h)                                                              |                      |
| - shape of apex                                                                        | acute                                                                                          | + (b, f, h)          | + (a, b, h)              | + (h)                                                                 |                      |
|                                                                                        | subacute                                                                                       | + (b, g, h)          | + (b, h)                 | + (f, h)                                                              |                      |
|                                                                                        | rounded or obtuse                                                                              | + ( <b>b, g, h</b> ) | + (a, b, c, f, g, h)     | + (f, h)                                                              | + (f, i)             |
| - type of margin                                                                       | serrate                                                                                        | + (f)                |                          |                                                                       |                      |
|                                                                                        | crenate                                                                                        | + (b, g, h)          | + (a, b, f, g, h)        | + (f, h)                                                              | + (f, i)             |
| <b>flower</b>                                                                          |                                                                                                |                      |                          |                                                                       |                      |
| - length of CH sepals with calycine appendages (mm)                                    |                                                                                                | 4.5–8.0 (f, g, h)    | <b>3.5–7.0</b> (f, g, h) | 4.0–7.5 (f, h)                                                        | <b>3.5–5.0</b> (f)   |
| - length of CH spur (mm)                                                               |                                                                                                | 2.5–3.5 (g, f)       | <b>0.5–1.5</b> (f, g)    | 1.0–3.0 (f)                                                           | <b>1.0–1.5</b> (f)   |
| - length of CH lower petal with spur (mm)                                              |                                                                                                | 12–23 (f, g, h)      | <b>8–14</b> (f, g, h)    | 10–16 (f, h)                                                          | <b>9–12</b> (f)      |
| - location of the bracts on the pedicel                                                | ratio of distance of bracts from rhizome to length of pedicel                                  | 0.50–0.93 (f, h)     | <b>0.20–0.60</b> (f, h)  | 0.32–0.70 (f, h)                                                      | <b>0.31–0.66</b> (f) |
|                                                                                        | in the lower half of the pedicel                                                               |                      | + (b, c, g)              |                                                                       |                      |
|                                                                                        | in the middle of the pedicel or slightly above                                                 |                      | + (b, c)                 |                                                                       | + (i)                |
|                                                                                        | in the upper half of the pedicel                                                               | + (a, b, c, g)       |                          |                                                                       | + (i)                |
| - pubescence of CH lateral petals                                                      | hairy                                                                                          | + (b, f, h)          | + (f, g, h)              | + (f, h)                                                              | + (f, i)             |
|                                                                                        | glabrous                                                                                       | + (b, f, g, h)       | + (g)                    |                                                                       |                      |
| - pubescence of pedicel                                                                | hairy (scattered hairs)                                                                        | + (g, i)             | + (g, i)                 | + (i)                                                                 | + (i)                |
|                                                                                        | glabrous                                                                                       | + (g, i)             | + (g, i)                 | + (i)                                                                 | + (i)                |
| - pubescence of petiole                                                                | hairy (scattered hairs)                                                                        | + (g, i)             | + (g, i)                 | + (i)                                                                 | + (i)                |
|                                                                                        | glabrous                                                                                       | + (g, i)             | + (c, g, i)              | + (i)                                                                 | + (i)                |
| <b>karyology and embryology</b>                                                        |                                                                                                |                      |                          |                                                                       |                      |
| - chromosome number (2n) /ploidy level (x)                                             |                                                                                                | 24/4x (d, g)         | <b>48/8x</b> (d, g)      | 36/6x (d)                                                             | <b>48/8x</b> (d)     |
| - fruits (capsules) filled with seeds (fully fertile); female line development regular |                                                                                                | + (d, e, h, i)       | + (d, e, h, i)           |                                                                       | + (e, i)             |
| - lack of fruits (fully sterile) female line development disturbed                     |                                                                                                |                      |                          | + (d, e, h, i)                                                        |                      |
| - pollen viability (stainability)                                                      | viable (80–100 %); male meiosis regular                                                        | + (e, i)             | + (e, i)                 |                                                                       | + (e, i)             |
|                                                                                        | 0–30% viable pollen grains, male meiosis disturbed, pollen grains cytologically differentiated |                      |                          | + (e, i)                                                              |                      |

a – Hegi 1925 [23]; b – Zabłocki 1947 [63]; c – Valentine et al. 1968 [26]; d – Kuta 1989a [8]; e – Kuta 1989b [9]; f – Kuta 1991 [10]; g – Karlsson and Marcussen 2010 and references therein [17]; h – Żabicka et al. 2020 [30]; i – Żabicka personal observations in the nature and in cultivation. CH – chasmogamous flowers.
