# Supplementary material for: Genetic Variation versus Morphological Variability in European Peatland Violets (Viola epipsila—V. palustris Group)
Source: MDPI journal article supplement (doi:10.3390/biology12030362), 2023-02-24
Supplement: s1 [file s1]

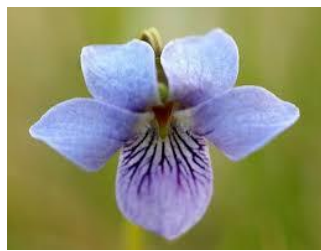

*V. epipsila*  
n=12

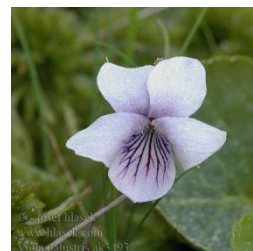

*V. palustris*  
n=24

triploid hybrid  
2n=36

type of male gametes

12

24

36

aneuploid numbers 3-28

back cross towards  
*V. palustris*  
n=24

back cross towards  
*V. epipsila*  
n=12

hybrid  
2n=48  
resembling  
*V. palustris*

hybrid  
2n=48  
resembling  
*V. epipsila*

repeated back crosses  
towards *V. palustris*  
n=24

repeated back crosses  
towards *V. palustris*  
n=24

stabilized introgressive  
forms 2n=48  
resembling *V. palustris*

**Basionym: *Viola palustris* subsp. *pubifolia* Kuta**  
**Fragm. Flor. Geobot. 35: 21, 1991**

***Viola pubifolia* (Kuta) G.H. Loos,**  
**comb. et stat. nov.,**  
**Jahrb. Bochum. Bot. Vereins 1: 130, 2010**

Based on Kuta 1989: Biosystematic studies on the genus *Viola* L., section *Plagiostigma* Godr. II. Embryological analysis of *V. epipsila* Ledeb., *V. palustris* L. and their hybrids from Poland at: <https://www.researchgate.net/publication/268218935>
