# Supplementary material for: Genetic Variation versus Morphological Variability in European Peatland Violets (Viola epipsila—V. palustris Group)
Source: MDPI journal article supplement (doi:10.3390/biology12030362), 2023-02-24
Supplement: s1 [file s1]

Table S1. Plant material of *V. pubifolia*, *V. epipsila*, *V. palustris* and hybrids *V. epipsila* × *V. palustris* for molecular analyses: genome size value; ISSR markers; *GPI* genes; RAD-Seq.

| Taxon                      | Designation of samples                | Taxon identification                                                                                                 | Localities                                  | Geographical coordinates | Collector**     | Used for particular analysis (+) |      |     |         |
|----------------------------|---------------------------------------|----------------------------------------------------------------------------------------------------------------------|---------------------------------------------|--------------------------|-----------------|----------------------------------|------|-----|---------|
|                            |                                       |                                                                                                                      |                                             |                          |                 | 2C-DNA                           | ISSR | GPI | RAD-seq |
| <i>Viola pubifolia</i>     | Rs1-Rs12                              | genome size, observations in the field by J&PŽ based on previously published morphological features (Kuta 1991 [10]) | Słowiński National Park, Poland NW          | 54.74933, 17.46275       | JŽ, PŽ          |                                  |      |     | +       |
|                            | SPN1-21, 23-57, 59-61, 63-64, SPN67   |                                                                                                                      |                                             |                          |                 | +                                | +    | +   |         |
|                            | SPN68-SPN86                           |                                                                                                                      |                                             |                          |                 | +                                |      |     |         |
|                            | Rs24 (=N_B!6)                         | observations in the field by RH based on morphological features, samples also used in Żabicka et al. 2020 [30]       | Floß, Germany SE                            | 49.712330, 12.238800     | RH              |                                  |      |     | +       |
|                            | N_B!2*, N_B!3*, N_B!5*                | observations in the field by RH based on morphological features, samples also used in Żabicka et al. 2020 [30]       | Floß, Germany SE                            | 49.712330, 12.238800     | RH              |                                  | +    |     |         |
| <i>Viola palustris</i>     | BAL_7*, BAL_9*, BAL_10*               | based on Żabicka et al. 2020 [30]                                                                                    | Balinka, Poland NE                          | 53.806423, 23.172279     | EK              |                                  | +    |     |         |
|                            | Rs14 (=N_B3)                          |                                                                                                                      | “Dormitzer Forst” Kalchreuth, Germany SE    | 49.565470, 11.109230     | RH              |                                  |      |     | +       |
|                            | N_E1, N_E2                            | observations in the field by FS based on morphological features                                                      | Grillenburg, Germany E                      | 50.940814, 13.497555     | FS              |                                  | +    |     |         |
|                            | N_E3                                  |                                                                                                                      | Oberlausitz, Germany E                      | 51.202770, 14.849602     |                 |                                  | +    |     |         |
|                            | Rs15 (=L_18*), L_19*, L_20*           | based on Żabicka et al. 2020 [30]                                                                                    | Pravalas Botanical Reserve, Lithuania E     | 54.958060, 25.676570     | ZG              |                                  | +    |     | +       |
|                            | NO1, NO2, NO3                         | genome size, observations in the field by AR based on morphological features                                         | Barmøya, Norway SW                          | 62.005556, 5.261216      | AR              | +                                | +    |     |         |
|                            | Rs21                                  | genome size, observations in the field by ZC, PSZ, JŽ, PŽ, based on morphological features                           | Połajewo near Poznań, Poland W              | 52.733254, 16.735284     | ZC, PSZ, JŽ, PŽ | +                                |      |     | +       |
| <i>Viola epipsila</i>      | Rs16 (=SZ_4*), SZ_6*, SZ_7*           | based on Żabicka et al. 2020 [30]                                                                                    | Szczupliny, Poland NE                       | 53.374917, 20.001750     | LM              |                                  | +    |     | +       |
|                            | Rs17 (=L_1)                           |                                                                                                                      | Pravalas Botanical Reserve, Lithuania E     | 54.958060, 25.676570     | ZG              |                                  |      |     | +       |
|                            | Rs18 (=BPN1)                          |                                                                                                                      | Białowieża National Park, Poland NE         | 52.778390, 23.856920     | JŽ, LM, AK      |                                  |      |     | +       |
| Hybrids F <sub>1</sub>     | Rs19 (=BPN2)                          |                                                                                                                      | Białowieża National Park, Poland NE         | 52.778390, 23.856920     | JŽ, LM, AK      |                                  |      |     | +       |
|                            | Rs20 (=OST_2), OST_1*, OST_3*, OST_5* |                                                                                                                      | Ostrów Tarczyński Nature Reserve, Poland NE | 53.339667, 19.889250     | LM              |                                  | +    |     | +       |
| Number of sample used: 121 |                                       |                                                                                                                      |                                             |                          |                 |                                  |      |     |         |

\*In this study, isolated DNA samples were used from Żabicka et al. 2020 [30]; in parentheses - samples designed as in Żabicka et al. 2020 [30]

Rs – DNA samples used for RAD-seq

\*\*EK – Elżbieta Kuta, RH – Rudolf Höcker, JŻ – Justyna Żabicka, PŻ – Piotr Żabicki, ZC - Zbigniew Celka, PSZ - Piotr Szkudlarz, LM – Leszek Mackiewicz, AK –Andrzej Keczyński, ZG – Zigmantas Gudžinskas, FS – Friedrich Sander, AR – Adam Rostański
