# Supplementary material for: Genetic Variation versus Morphological Variability in European Peatland Violets (Viola epipsila—V. palustris Group)
Source: MDPI journal article supplement (doi:10.3390/biology12030362), 2023-02-24
Supplement: s1 [file s1]

Table S4. Sequences of used ISSR primers and their annealing temperatures.

| Primer | Primer sequence (5'-3')  | Annealing<br>temperature<br>(°C) |
|--------|--------------------------|----------------------------------|
| ISSR1  | 5'-TCTCTCTCTCTCTCC-3'    | 50.2                             |
| ISSR2  | 5'-AGAGAGAGAGAGAGAGT-3'  | 49.9                             |
| ISSR3  | 5'-GGGTGGGGTGGGGTG-3'    | 53                               |
| ISSR4  | 5'-ATGATGATGATGATGATG-3' | 44                               |
| ISSR5  | 5'-ACACACACACACACACG-3'  | 48.6                             |
| ISSR6  | 5'-ACACACACACACACACT-3'  | 42.6                             |
| ISSR7  | 5'-GAGAGAGAGAGAGAGAYG-3' | 48                               |
| ISSR8  | 5'-ACACACACACACACACYC-3' | 50.3                             |
| ISSR9  | 5'-GACAGACAGACAGACA-3'   | 44                               |
| ISSR10 | 5'-ACTGACTGACTGACTG-3'   | 44                               |
