# Supplementary figures and images for: Genetic Variation versus Morphological Variability in European Peatland Violets (Viola epipsila—V. palustris Group)
Source: MDPI journal article supplement (doi:10.3390/biology12030362), 2023-02-24

$$\text{DeltaK} = \text{mean}(|L''(K)|) / \text{sd}(L(K))$$

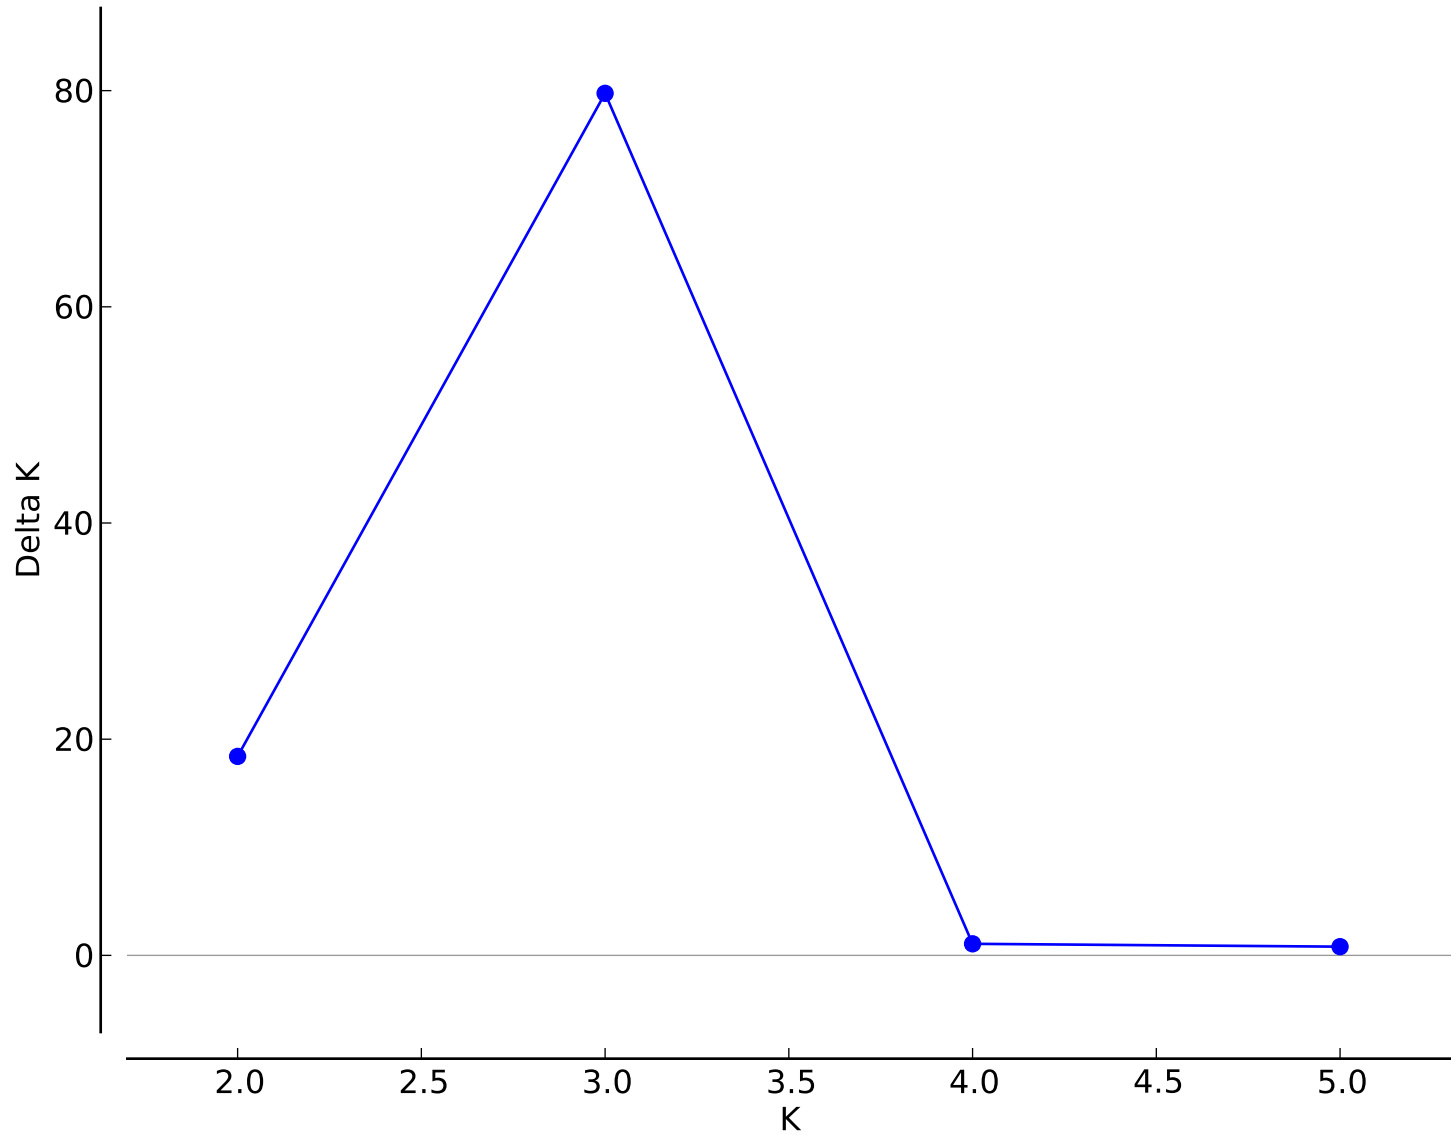

Supplement: s1 [file s1]
